# Supplementary material
Source: PubMed Central journal article supplement (PMC4839405)
Supplement: pnas.1601653113.sapp.pdf [file pnas.1601653113.sapp.pdf]

## Supporting Information for

# Engineering a long-acting, potent exendin-4 analog for microstructure-based transdermal delivery

Peng-Yu Yang<sup>1,2</sup>, Huafei Zou<sup>2</sup>, Elizabeth Chao<sup>2</sup>, Lance Sherwood<sup>2</sup>, Vanessa Nunez<sup>2</sup>, Michael Keeney<sup>3</sup>, Esi Ghartey-Tagoe<sup>3</sup>, Zhongli Ding<sup>3</sup>, Herlinda Quirino<sup>2</sup>, Xiaozhou Luo<sup>1</sup>, Gus Welzel<sup>2</sup>, Guohua Chen<sup>3</sup>, Parminder Singh<sup>3</sup>, Ashley Woods<sup>2</sup>, Peter G. Schultz<sup>1,2</sup>, Weijun Shen<sup>2</sup>

<sup>1</sup>Department of Chemistry and the Skaggs Institute for Chemical Biology, The Scripps Research Institute, 10550 North Torrey Pines Road, La Jolla, California 92037, United States. <sup>2</sup>Institute for Biomedical Research, 11119 North Torrey Pines Road, Suite 100, La Jolla, California 92037, United States. <sup>3</sup>Corium International, Inc., 235 Constitution Drive, Menlo Park, California 94025, United States

|                                                                                                 |           |
|-------------------------------------------------------------------------------------------------|-----------|
| <b>SI APPENDIX</b>                                                                              | <b>1</b>  |
| <b>1. Synthesis of cross-linkers</b>                                                            | <b>2</b>  |
| <b>2. Peptide cross-linking</b>                                                                 | <b>9</b>  |
| <b>3. Generation of CRE-Luc stable cell line over-expressing GLP-1 receptor</b>                 | <b>9</b>  |
| <b>4. In vitro GLP-1 receptor activation reporter assay (receptor-mediated cAMP synthesis)</b>  | <b>9</b>  |
| <b>5. Circular dichroism (CD) measurements</b>                                                  | <b>10</b> |
| <b>6. Pharmacokinetics of peptides in mice</b>                                                  | <b>10</b> |
| <b>7. Oral glucose tolerance test (OGTT) and intraperitoneal glucose tolerance test (IPGTT)</b> | <b>11</b> |
| <b>8. Body weight, food intake, and visceral fat mass measurement</b>                           | <b>11</b> |
| <b>9. PPAR<math>\gamma</math> mRNA level measurement</b>                                        | <b>11</b> |
| <b>10. Cholesterol level determination</b>                                                      | <b>11</b> |
| <b>11. Triglyceride level measurement</b>                                                       | <b>12</b> |
| <b>12. Oil red O staining (Lipid droplet staining)</b>                                          | <b>12</b> |
| <b>SI Appendix Tables</b>                                                                       | <b>13</b> |
| <b>SI Appendix Figures</b>                                                                      | <b>18</b> |

## SI Appendix

### 1. Synthesis of cross-linkers

General procedure for non-branched linkers **L1-L12**

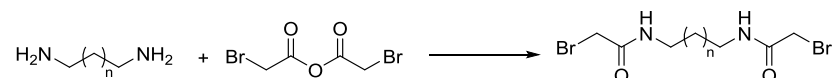

To a solution of diamines (1 mmol) in DCM (10 mL) was added bromoacetic anhydride (0.52 g, 2 mmol) and DIEA (0.35 mL, 2 mmol) at  $-20\text{ }^\circ\text{C}$ . The reaction mixture was stirred for 2 h and the solvent was removed under reduced pressure. The residue was taken up in EtOAc (20 mL) and transferred to a separatory funnel. The organic phase was washed (1 N HCl, brine, sat.  $\text{NaHCO}_3$ , brine), dried ( $\text{Na}_2\text{SO}_4$ ), filtered, and concentrated to afford the product as white solids. The products were used in the next steps without further purification.

A first branched cross-linker having the structure

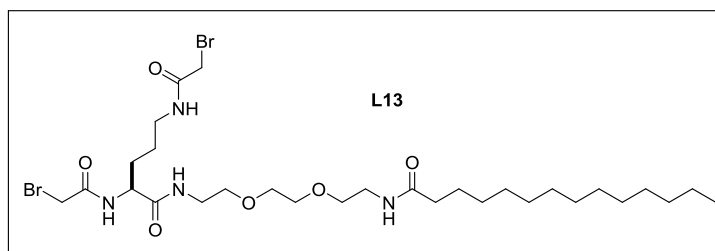

was made according to the following:

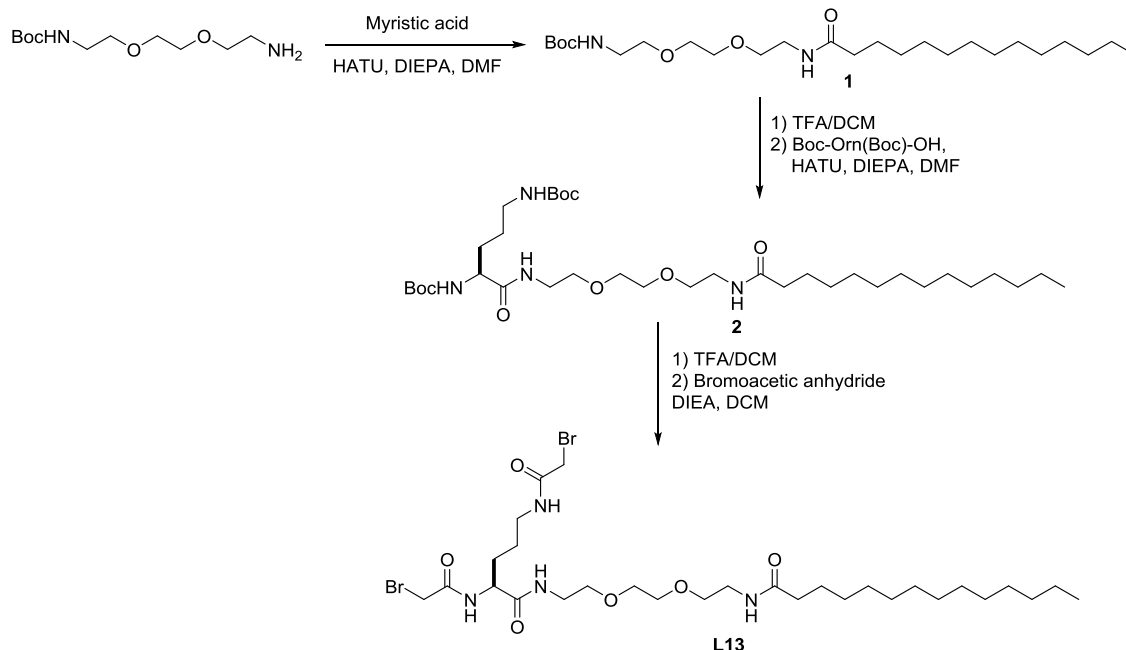

*tert*-butyl (2-(2-(2-tetradecanamidoethoxy)ethoxy)ethyl)carbamate (**1**).

To a solution of myristic acid (0.46 g, 2 mmol) in 5 mL of DMF was added HATU (0.8 g, 2.1 mmol), DIEPA (0.4 mL, 2.2 mmol) and *tert*-butyl (2-(2-(2-aminoethoxy)ethoxy)ethyl)carbamate (0.5 g, 2 mmol). The reaction mixture was stirred for 6 h and the solvent was removed under reduced pressure. The residue was taken up in EtOAc (50 mL) and transferred to a separatory funnel. The organic phase was washed (1 N HCl, brine, sat. NaHCO<sub>3</sub>, brine), dried (Na<sub>2</sub>SO<sub>4</sub>), filtered, and concentrated to afford **1** as white solids in 90% yield. ESI-MS: calcd MW 458.4; found 459.6 [M+1]<sup>+</sup>. The product was used in the next step without further purification.

di-*tert*-butyl (5,16-dioxo-9,12-dioxa-6,15-diazanonacosane-1,4-diyl)dicarbamate (**2**).

A solution of **1** (0.46 g, 1 mmol) in DCM (10 mL) was added TFA (5 mL) at 0°C. The reaction mixture was stirred for 2 h and the solvent was removed under reduced pressure. The residue was washed with ether twice (2 x 10 mL) and dried to afford the Boc-deprotected product. The product was used in the next steps without further purification. To a solution of Boc-deprotected product in 10 mL of DMF was added DIEPA (0.4 mL, 2.2 mmol), Boc-Orn(Boc)-OH (0.33 g, 1 mmol) and HATU (0.41 g, 1.1 mmol). The reaction mixture was stirred for 6 h and the solvent was removed under reduced pressure. The residue was taken up in EtOAc (50 mL) and transferred to a separatory funnel. The organic phase was washed (1 N HCl, brine, sat. NaHCO<sub>3</sub>, brine), dried

(Na<sub>2</sub>SO<sub>4</sub>), filtered, and concentrated to afford **2** as a white solid in 87% yield. ESI-MS: calcd MW 672.9; found 673.6 [M+1]<sup>+</sup>. The product was used in the next step without further purification.

(*S*)-*N,N'*-(5,16-dioxo-9,12-dioxa-6,15-diazanonacosane-1,4-diyl)bis(2-bromoacetamide) (**L13**).

A solution of **2** (0.33 g, 0.5 mmol) in DCM (10 mL) was added TFA (5 mL) at 0°C. The reaction mixture was stirred for 2 h and the solvent was removed under reduced pressure. The residue was washed with ether twice (2 x 10 mL) and dried to afford the Boc-protected product. The product was used in the next steps without further purification. To a solution of Boc-protected product in 10 mL of DCM was added DIEPA (0.4 mL, 2.2 mmol) and bromoacetic anhydride (0.26 g, 1 mmol). The reaction mixture was then stirred for 6 h, and the solvent was removed under reduced pressure. The residue was taken up in EtOAc (50 mL) and transferred to a separatory funnel. The organic phase was washed (1 N HCl, brine, sat. NaHCO<sub>3</sub>, brine), dried (Na<sub>2</sub>SO<sub>4</sub>), filtered, and concentrated to afford **L13** as white solids in 83% yield. ESI-MS: calcd MW 714.6; found 715.4 [M+1]<sup>+</sup>. The product was used to prepare the cross-linked peptide **E3** without further purification.

A second branched cross-linker having the structure

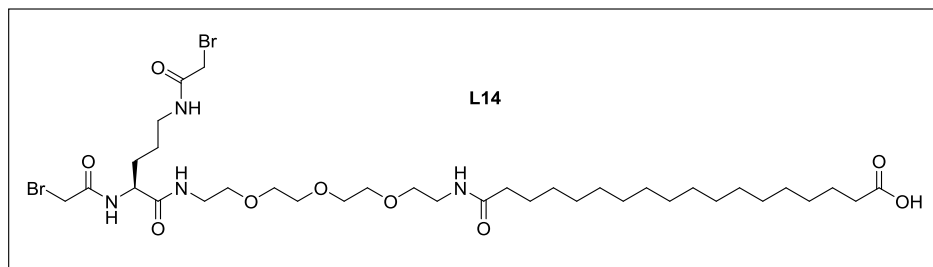

was made according to the following:

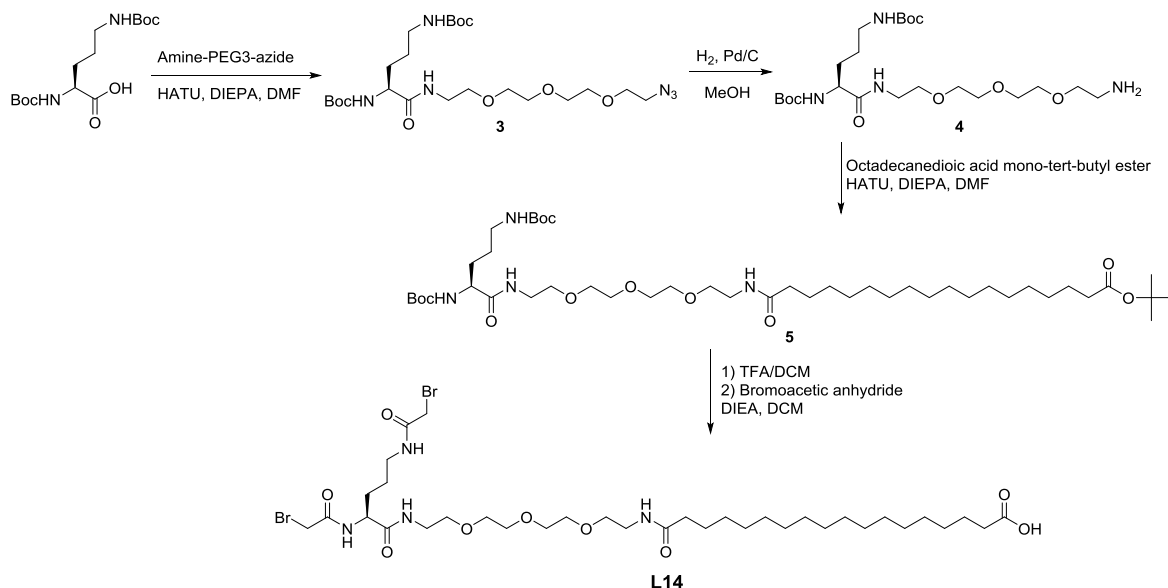

**(S)-di-tert-butyl (1-azido-13-oxo-3,6,9-trioxa-12-azaheptadecane-14,17-diyl)dicarbamate (3)**

To a solution of Boc-Orn(Boc)-OH (1.32 g, 4 mmol) in 10 mL of DMF was added HATU (1.7 g, 4.4 mmol), DIEPA (0.75 mL, 4.4 mmol) and 2-(2-(2-(2-azidoethoxy)ethoxy)ethoxy)ethanamine (amine-Peg3-azide, 0.88 g, 4 mmol). The reaction mixture was stirred for 16 h and the solvent was removed under reduced pressure. The residue was taken up in EtOAc (100 mL) and transferred to a separatory funnel. The organic phase was washed (1 N HCl, brine, sat. NaHCO<sub>3</sub>, brine), dried (Na<sub>2</sub>SO<sub>4</sub>), filtered, and concentrated to afford **3** as white solids in 75% yield. The product was used in the next step without further purification.

**(S)-di-tert-butyl (1-amino-13-oxo-3,6,9-trioxa-12-azaheptadecane-14,17-diyl)dicarbamate (4)**

To a solution of **3** (1.06 g, 2 mmol) in MeOH (20 mL) was added Pd/C (0.11 g) and a hydrogen balloon (1 atm of H<sub>2</sub>). The reaction mixture was stirred for 6 h and filtered through celite twice to remove Pd/C. The solvent was removed under reduced pressure. The crude product was used immediately in the next step without further purification.

**(S)-tert-butyl 9-((tert-butoxycarbonyl)amino)-2,2-dimethyl-4,10,24-trioxo-3,14,17,20-tetraoxa-5,11,23-triazahentetracontan-41-oate (5)**

To a solution of above hydrogenated product (0.31 g, 0.6 mmol) in 10 mL of DMF was added octadecanedioic acid mono-tert-butyl ester (0.22 g, 0.6 mmol), HATU (0.23 g, 0.6 mmol) and



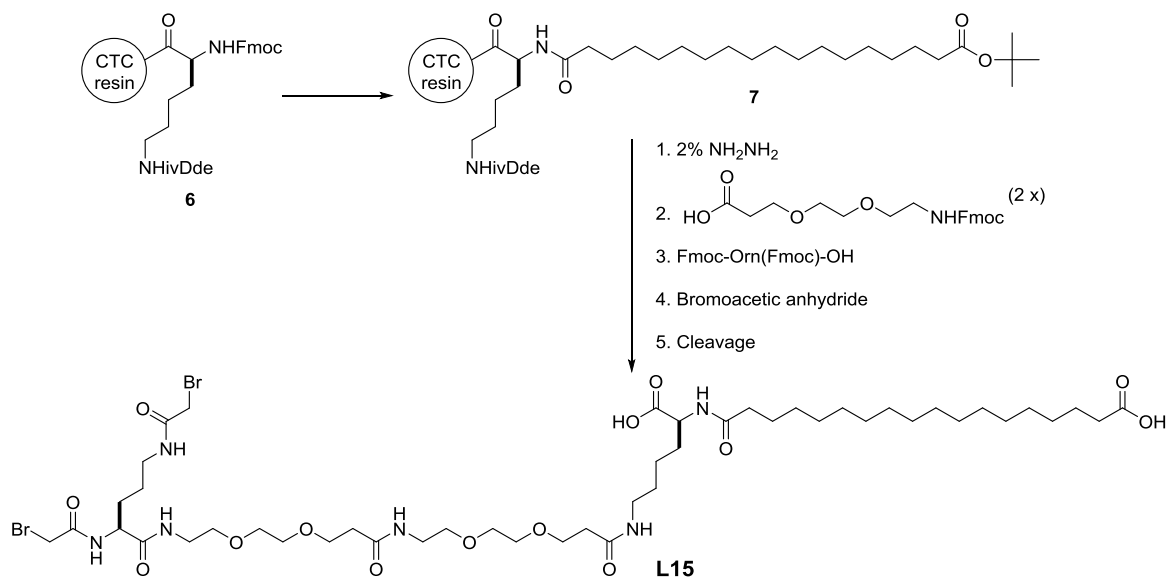

#### Preparation of Fmoc-Lys(ivDde)-2-chlorotrityl resin (**6**)

2-Chlorotrityl chloride resin (Novabiochem, 100-200 mesh, 1 % DVB, loaded 1.0 mmol/g) (5.0 g, 5 mmol) was swollen in DCM (80 mL) for 1 h and then drained. A solution of Fmoc-Lys(ivDde)-OH (Novabiochem, 1 equiv) was suspended in DMF (30 mL) and DCM (30 mL) and DIPEA (1.1 equiv). This suspension was added to the resin and shaken for 2 h. The resin was drained and washed with DMF (3x), DCM (3x) and treated with  $\text{CH}_3\text{OH}/\text{DCM}/\text{DIPEA}$  (8:1:1) for 30 min to cap the unreacted trityl chloride sites, washed with DCM (3x), and dried under vacuum, and stored in a desiccator until use.

#### C18-diacid-Lys(ivDde)-2-chlorotrityl resin (**7**)

Solid-supported **6** (5 mmol) was added a solution of 20% piperidine in DMF (100 mL). The mixture was shaken for 30 min and drained. Another 50 mL of 20% piperidine in DMF was added and the mixture was shaken for another 30 min. Positive ninhydrin test was observed. The resin was then washed as described above for **6**. The resin was then treated with octadecanedioic acid mono-*tert*-butyl ester (AstaTech) (3 equiv, 15 mmol), HATU (3.3 equiv), and DIPEA (3.3 equiv) in DMF (100 mL) for 2 h and repeated until a negative ninhydrin test was observed. The resin was washed with DMF and DCM as described for **6** and used directly in the next step.

(7S,34S)-1-bromo-7-(2-bromoacetamido)-34-carboxy-2,8,18,28,36-pentaoxo-12,15,22,25-tetraoxa-3,9,19,29,35-pentaazatripentacontan-53-oic acid (**L15**)

Solid-supported **7** was treated twice with 2% hydrazine in DMF (100 mL, 15 min). Positive ninhydrin test was observed. The resin was then washed as described for **6** and treated with Fmoc-PEG2-propionic acid (Quanta BioDesign) (3 equiv) using HATU (3.3 equiv), and DIPEA (3.3 equiv) in DMF (100 mL) for 2 h. The resin was then washed as described above for **6**. Then Fmoc group was removed and washing steps were repeated as described above for **6**. The resin was then treated with Fmoc-Orn(Fmoc)-OH (Novabiochem, 3 equiv), HATU (3.3 equiv), and DIPEA (3.3 equiv) in DMF (100 mL) for 2 h. The resin was again washed as described above for **6**. Then Fmoc group was removed and washing steps were repeated as described above for **6**. The resin was then treated with bromoacetic anhydride (4 equiv), and DIPEA (4.4 equiv) in 200 mL of DCM for 30 min. After washing with DCM (3x), the product was cleaved from the resin using 5 mL of 80% TFA in DCM containing 10% H<sub>2</sub>O and 10% triisopropylsilane for 1 h. After cleavage, TFA was removed under reduced pressure. The resulting yellow residue was washed twice with cold diethyl ether and was finally dried to a crude product as yellow powder. The crude peptide was dissolved in DMSO (5 mL) and this solution was diluted to a final volume of 100 mL with 50% CH<sub>3</sub>CN-water. The solution was filtered. The filtered solution (10 mL) was loaded onto the preparative HPLC column (Phenomenex, Prep C18, 300A, 50 x 250 mm) equilibrated with 10% CH<sub>3</sub>CN (0.05% TFA) in water (0.05% TFA), and the column was eluted with 10% CH<sub>3</sub>CN (0.05% TFA) in water (0.05% TFA) to wash DMSO from the column. The composition of the eluent then was ramped to 35% CH<sub>3</sub>CN-water (0.05%TFA) over 1 min, and a linear gradient was initiated at a rate of 3%/min of CH<sub>3</sub>CN (0.05% TFA) into water (0.05% TFA) and run for 30 min. Eluted fractions were checked for purity on an analytical scale reversed phase C18 column (Phenomenex, C18, 120A, 4.6 x 50 mm) and fractions containing the product in >95% purity were combined and lyophilized to afford **L15** in 31% product yield. The molecular weight of product was analyzed by ESI-MS: calcd MW 1117.0; found 1118.3 [M+1]<sup>+</sup>, 1119.2 [M+2]<sup>+</sup>.



## **2. Peptide cross-linking**

The cross-linking reaction was carried out by incubating the dicysteine-containing peptides (2 mM) (Innopep, San Diego, CA; greater than 95% purity) with 1.5 equiv of cross-linkers in a mixed solvent solution (1:3 CH<sub>3</sub>CN/30 mM NH<sub>4</sub>HCO<sub>3</sub> buffer, pH 8.5). The mixture was stirred at RT for 2-4 hours. Under ice cooling, acetic acid was then added dropwise to pH 5. Crude cross-linked peptide was then purified by preparative HPLC column (Phenomenex, Prep C18, 300A, 50 x 250 mm) with a linear gradient from 10% to 70% acetonitrile/water containing 0.1% trifluoroacetic acid for 30 min at a flow rate of 15 mL/min. The fractions containing the products were collected and lyophilized to afford the products as a powder with >95% purity and in >70% product yield. Their identity was confirmed by ESI-MS and MALDI-TOF. Analytical HPLC was performed using an Agilent 1100 series LC/MS system with a ZORBAX C18 column (5 μm, 150 × 4.6 mm) from Agilent with a linear gradient of 10-70% acetonitrile/water containing 0.05% trifluoroacetic acid for 20 min at a flow rate of 1.0 mL/min with UV-vis detection wavelength set at 220 and 254 nm.

## **3. Generation of CRE-Luc stable cell line over-expressing GLP-1 receptor**

HEK293 cells were infected with lentivirus encoding firefly luciferase gene under the control of cAMP responsive element (CRE) promoter (Qiagen, Netherlands) and then were selected using 1 μg/mL puromycin (Life technologies, Carlsbad) for 1 week. The surviving cells (referred to as CRE-HEK293) were expanded and then transfected with a G418 selective mammalian expression plasmid encoding human GLP-1R. In brief, GLP-1R plasmid was transfected into CRE-HEK293 cells using Lipofectamine 2000 and selected with 400 μg/mL geneticin (Life technologies, Carlsbad, CA). Single colony stable cell line over-expressing both CRE-luciferase and GLP-1R (HEK293-GLP-1R-CRE) was then established for in vitro activity assay.

## **4. In vitro GLP-1 receptor activation reporter assay (receptor-mediated cAMP synthesis)**

HEK293-GLP-1R-CRE cells were seeded in 384-well plates at a density of 5000 cells per well and cultured for 18 hours in DMEM with 10% FBS at 37°C and 5% CO<sub>2</sub>. Cells were treated with peptides in a dose dependent manner for 24 hours, and receptor activation was reported by luminescence intensities, using One-Glo (Promega, WI) luciferase reagent following

manufacturer's instruction. The EC<sub>50</sub> of each peptide was determined using GraphPad Prism 6 software (GraphPad, San Diego, CA).

## 5. Circular dichroism (CD) measurements

CD spectra were recorded with an AVIV model 420SF CD spectrometer at 25 °C in a 2 mm path-length cuvette. The spectra were recorded in the wavelength range of 190-260 nm and averaged over 3 scans with a resolution of 0.5 nm, a bandwidth of 1.0 nm and a response time of 3 s. All peptides were dissolved in water to reach final concentrations of 40 μM. The mean residue ellipticity was plotted vs wavelength.

## 6. Pharmacokinetics of peptides in mice

Female CD-1 mice (N=4) from Charles River Laboratory were fasted overnight and administered with 100 μL of each peptide in phosphate buffered saline by intravenous (*i.v.*) or subcutaneous (*s.c.*) route. Food was provided to mice immediately after bleeding at 30 minute. Blood was extracted into heparin tubes and centrifuged at 3,000x g for 15 min. The resulting supernatant plasma were then stored at -80 °C for peptide concentration determination. The concentrations of peptides in plasma at each time point were determined by in vitro cell based activity assay. Briefly, HEK293-GLP-1R-CRE cells were treated with plasma samples at different time points (5 point dose response, starting from 1:10 to 1:100 dilution of each plasma sample) and incubated for 16 hours in DMEM with 10% FBS at 37°C with 5% CO<sub>2</sub>, and the firefly luciferase activity was then measured. At the same time, same peptides were used to obtain standard curves and parameters for Bottom, Top, EC<sub>50</sub>, and Hill Slope. Random luciferase unit (RLU) for each plasma sample was used to calculate the peptide concentrations in plasma (nmol/L), using parameters derived from the standard curve ( $RLU = Bottom + (Top - Bottom) / (1 + 10^{((LogEC_{50} - Conc.) * Hill Slope)})$ ). Peptide concentrations in plasma were obtained and plotted against time points to obtain in vivo half-life of each peptide, using WinNonLin Phoenix software (Pharsight Corp, St. Louis, MO).

## **7. Oral glucose tolerance test (OGTT) and intraperitoneal glucose tolerance test (IPGTT)**

Female Charles River CD-1 mice were fasted overnight and then administered with 100  $\mu$ l of each peptide in PBS (pH = 7.3) by *i.v.* or *s.c.* route. After 6 hours, mice were orally or intraperitoneally administered with 2 g of glucose solution per kg body weight and their tail blood glucose levels were measured before (0 min) and after glucose challenge for 2 to 3 hours.

## **8. Body weight, food intake, and visceral fat mass measurement**

Charles River Diet Induced Obese (DIO) mice were administered by daily subcutaneous injections of peptides. Mouse body weight and food intake were monitored daily throughout the study. At the end of the experiment, mice were sacrificed and visceral fat mass were taken out and weighed.

## **9. PPAR $\gamma$ mRNA level measurement**

Total RNA from mouse white adipose tissue was extracted with TRIZOL (Life technology, Carlsbad, CA) and cDNA was synthesized using high-capacity cDNA reverse transcription kit (ThermoFisher scientific, Pittsburgh, PA). Quantitative RT-PCR reactions were conducted and analyzed on a ViiA 7 Real-time PCR System (ThermoFisher scientific, Pittsburgh, PA). Endogenous PPAR $\gamma$  and was determined using the SYBR qPCR premix (Clontech, Mountain View, CA). GAPDH was also measured as the standard gene.

## **10. Cholesterol level determination**

Collected plasma was used for cholesterol level determination according to the manufacturer's guide (cholesterol assay kit, Abcam, Cambridge, England). Briefly, plasma was diluted using cholesterol assay buffer and then reacted with the same volume of reaction mix containing cholesterol assay buffer, cholesterol probe, enzyme mix and cholesterol esterase. After incubation at 37 °C for 1 hour, the absorbance at 560 nm was measured using an Envision multilabel plate reader (PerkinElmer, Waltham, MA). Subsequently, the concentration of cholesterol in plasma was calculated according to a standard curve.

## **11. Triglyceride level measurement**

Collected plasma was used for triglyceride level determination using a triglyceride colorimetric assay kit (Cayman chemical, Ann Arbor, Michigan). 5  $\mu$ L of plasma samples or standard were plated into a 384 well plate and followed by adding 75  $\mu$ L of diluted enzyme buffer to each well. The mixture was incubated at room temperature for 15 min, and the absorbance was read at 560 nm using an Envision plate reader (PerkinElmer, Waltham, MA). The concentration of triglyceride in plasma was calculated using a standard curve.

## **12. Oil red O staining (Lipid droplet staining)**

Frozen tissue sections of liver were cut at 10  $\mu$ m and air dried onto the slides. After fixation in 10% formalin for 5 min, the slides were briefly washed with running tap water for 10 min, followed by rinse with 60% isopropanol. Subsequently, oil red O working solution (0.3% oil red O) was used to stain lipid for 15 min. Slides were again rinsed with 60% isopropanol and then nuclei were lightly stained with alum haematoxylin, followed by rinse with distilled water and mounted in glycerin jelly. Pictures were taken under microscopy.

## SI Appendix Tables

**Table S1.** Structure of synthetic cross-linkers used in this study

| Entry | Name       | Structure                                                                           |
|-------|------------|-------------------------------------------------------------------------------------|
| 1     | <b>L1</b>  | 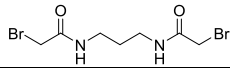   |
| 2     | <b>L2</b>  |    |
| 3     | <b>L3</b>  |    |
| 4     | <b>L4</b>  |    |
| 5     | <b>L5</b>  |    |
| 6     | <b>L6</b>  |    |
| 7     | <b>L7</b>  |    |
| 8     | <b>L8</b>  |    |
| 9     | <b>L9</b>  |   |
| 10    | <b>L10</b> |  |
| 11    | <b>L11</b> |  |
| 12    | <b>L12</b> |  |
| 14    | <b>L13</b> |  |
| 15    | <b>L14</b> |  |
| 16    | <b>L15</b> |  |

**Table S2.** Characterization of the cross-linked exendin-4 analogs

| Entry | Peptide          | Mass expected | Mass found                                                        | GLP-1R (EC <sub>50</sub> , pM) | Half-life (hours) <i>i.v.</i> , <i>s.c.</i>                                      |
|-------|------------------|---------------|-------------------------------------------------------------------|--------------------------------|----------------------------------------------------------------------------------|
| 1.    | <b>Exendin-4</b> | 4186.6        | 1047.6 ([M+4H] <sup>4+</sup> ),<br>838.2 ([M+5H] <sup>5+</sup> )  | 16                             | t <sub>1/2</sub> = 0.5 h ( <i>i.v.</i> )                                         |
| 2.    | <b>SEQ-1-L1</b>  | 4288.9        | 1073.2 ([M+4H] <sup>4+</sup> ),<br>858.8 ([M+5H] <sup>5+</sup> )  | 28                             | ND                                                                               |
| 3.    | <b>SEQ-1-L2</b>  | 4302.9        | 1076.2 ([M+4H] <sup>4+</sup> ),<br>861.4 ([M+5H] <sup>5+</sup> )  | 18                             | t <sub>1/2</sub> = 0.8 h ( <i>i.v.</i> )                                         |
| 4.    | <b>SEQ-1-L3</b>  | 4316.9        | 1080.2 ([M+4H] <sup>4+</sup> ),<br>864.4 ([M+5H] <sup>5+</sup> )  | 24                             | ND                                                                               |
| 5.    | <b>SEQ-1-L13</b> | 4687.5        | 1172.8 ([M+4H] <sup>4+</sup> ),<br>938.4 ([M+5H] <sup>5+</sup> )  | 20                             | ND                                                                               |
| 6.    | <b>SEQ-1-L14</b> | 4817.6        | 1205.3 ([M+4H] <sup>4+</sup> ),<br>964.4 ([M+5H] <sup>5+</sup> )  | 19                             | t <sub>1/2</sub> = 5.2 h ( <i>i.v.</i> ), C <sub>max</sub> = 4h ( <i>s.c.</i> )  |
| 7.    | <b>SEQ-1-L15</b> | 5089.9        | 1273.2 ([M+4H] <sup>4+</sup> ),<br>1018.7 ([M+5H] <sup>5+</sup> ) | 16                             | t <sub>1/2</sub> = 13.8 h ( <i>i.v.</i> ), C <sub>max</sub> = 4h ( <i>s.c.</i> ) |
| 8.    | <b>SEQ-2-L4</b>  | 4331.5        | 1444.7 ([M+3H] <sup>3+</sup> ),<br>1083.8 ([M+4H] <sup>4+</sup> ) | 31                             | ND                                                                               |
| 9.    | <b>SEQ-2-L5</b>  | 4345.5        | 1449.5 ([M+3H] <sup>3+</sup> ),<br>1087.4 ([M+4H] <sup>4+</sup> ) | 22                             | ND                                                                               |
| 10.   | <b>SEQ-2-L6</b>  | 4359.5        | 1454.1 ([M+3H] <sup>3+</sup> ),<br>1090.9 ([M+4H] <sup>4+</sup> ) | 49                             | ND                                                                               |
| 11.   | <b>SEQ-2-L7</b>  | 4373.5        | 1458.9 ([M+3H] <sup>3+</sup> ),<br>1094.4 ([M+4H] <sup>4+</sup> ) | 43                             | ND                                                                               |
| 12.   | <b>SEQ-2-L11</b> | 4353.0        | 1452.0 ([M+3H] <sup>3+</sup> ),<br>1089.2 ([M+4H] <sup>4+</sup> ) | 620                            | ND                                                                               |
| 13.   | <b>SEQ-3-L8</b>  | 4403.2,       | 1101.8 ([M+4H] <sup>4+</sup> ),<br>881.6 ([M+5H] <sup>5+</sup> )  | 530                            | ND                                                                               |
| 14.   | <b>SEQ-3-L9</b>  | 4417.2        | 1105.4 ([M+4H] <sup>4+</sup> ),<br>884.4 ([M+5H] <sup>5+</sup> )  | 150                            | ND                                                                               |
| 15.   | <b>SEQ-3-L10</b> | 4431.2        | 1108.8 ([M+4H] <sup>4+</sup> ),<br>887.2 ([M+5H] <sup>5+</sup> )  | 340                            | ND                                                                               |
| 16.   | <b>SEQ-3-L12</b> | 4423.1        | 1106.8 ([M+4H] <sup>4+</sup> ),<br>885.6 ([M+5H] <sup>5+</sup> )  | 850                            | ND                                                                               |

**Table S3.** *In vitro* functional profile of E6 against 168 different GPCRs.<sup>[a]</sup>

| Receptor     | Control Ligand                        | Replicate 1 (RLU) | Replicate 2 (RLU) | Mean RLU | SD    | %CV | % Activity of Control |
|--------------|---------------------------------------|-------------------|-------------------|----------|-------|-----|-----------------------|
| ADCYAP1R1    | PACAP-27                              | 155600            | 159600            | 157600   | 2828  | 2%  | 3%                    |
| ADORA3       | 2-Cl-IB-MECA                          | 157000            | 150800            | 153900   | 4384  | 3%  | 0%                    |
| ADRA1B       | Phenylephrine                         | 324800            | 304000            | 314400   | 14708 | 5%  | 0%                    |
| ADRA2A       | UK 14,304                             | 415600            | 409000            | 412300   | 4667  | 1%  | 0%                    |
| ADRA2B       | UK 14,304                             | 210400            | 203600            | 207000   | 4808  | 2%  | -1%                   |
| ADRA2C       | UK 14,304                             | 331800            | 327600            | 329700   | 2970  | 1%  | -1%                   |
| ADRB1        | Isoproterenol                         | 171000            | 180400            | 175700   | 6647  | 4%  | 2%                    |
| ADRB2        | Isoproterenol                         | 32600             | 34800             | 33700    | 1556  | 5%  | 0%                    |
| AGTR1        | Angiotensin II                        | 544600            | 545800            | 545200   | 849   | 0%  | -1%                   |
| AGTRL1       | Apelin-13                             | 412600            | 425400            | 419000   | 9051  | 2%  | 1%                    |
| AVPR1A       | Vasopressin                           | 29800             | 27000             | 28400    | 1980  | 7%  | 0%                    |
| AVPR1B       | Vasopressin                           | 34200             | 32600             | 33400    | 1131  | 3%  | 0%                    |
| AVPR2        | Vasopressin                           | 654400            | 697400            | 675900   | 30406 | 4%  | 1%                    |
| BDKRB1       | LDA-Bradykinin                        | 25800             | 28800             | 27300    | 2121  | 8%  | 0%                    |
| BDKRB2       | Bradykinin                            | 510800            | 535600            | 523200   | 17536 | 3%  | 1%                    |
| BRS3         | TAPN-Bombesin                         | 195400            | 195400            | 195400   | 0     | 0%  | 3%                    |
| C3AR1        | C3A Receptor Agonist (Short Fragment) | 72600             | 64800             | 68700    | 5515  | 8%  | 1%                    |
| C5AR1        | Complement C5a                        | 152600            | 146400            | 149500   | 4384  | 3%  | 1%                    |
| C5L2         | Complement C5a                        | 787600            | 785600            | 786600   | 1414  | 0%  | -3%                   |
| CALCR        | Calcitonin                            | 46600             | 50200             | 48400    | 2546  | 5%  | -2%                   |
| CALCRL-RAMP1 | beta CGRP                             | 74400             | 69400             | 71900    | 3536  | 5%  | 1%                    |
| CALCRL-RAMP2 | Adrenomedullin                        | 242000            | 222600            | 232300   | 13718 | 6%  | -1%                   |
| CALCRL-RAMP3 | Adrenomedullin                        | 552400            | 535200            | 543800   | 12162 | 2%  | 3%                    |
| CALCR-RAMP2  | Calcitonin                            | 132000            | 133400            | 132700   | 990   | 1%  | 3%                    |
| CALCR-RAMP3  | Calcitonin                            | 52600             | 47800             | 50200    | 3394  | 7%  | -1%                   |
| CCKAR        | CCK-8                                 | 21400             | 21200             | 21300    | 141   | 1%  | 0%                    |
| CCKBR        | CCK-8                                 | 763800            | 759000            | 761400   | 3394  | 0%  | 2%                    |
| CCR1         | CCL27                                 | 702400            | 743600            | 723000   | 29133 | 4%  | -3%                   |
| CCR10        | CCL3                                  | 70400             | 66000             | 68200    | 3111  | 5%  | -1%                   |
| CCR2         | CCL2                                  | 213400            | 183800            | 198600   | 20930 | 11% | 4%                    |
| CCR3         | CCL13                                 | 142800            | 150600            | 146700   | 5515  | 4%  | 4%                    |
| CCR4         | CCL22                                 | 227000            | 223000            | 225000   | 2828  | 1%  | 4%                    |
| CCR5         | CCL3                                  | 63200             | 67400             | 65300    | 2970  | 5%  | 1%                    |
| CCR6         | CCL20                                 | 48800             | 57000             | 52900    | 5798  | 11% | 0%                    |
| CCR7         | CCL19                                 | 454600            | 465200            | 459900   | 7495  | 2%  | 0%                    |
| CCR8         | CCL1                                  | 17600             | 19000             | 18300    | 990   | 5%  | 0%                    |
| CCR9         | CCL25                                 | 139000            | 128800            | 133900   | 7212  | 5%  | 1%                    |
| CHRM1        | Acetylcholine                         | 173400            | 185200            | 179300   | 8344  | 5%  | 0%                    |
| CHRM2        | Acetylcholine                         | 37600             | 44200             | 40900    | 4667  | 11% | 0%                    |
| CHRM3        | Acetylcholine                         | 33400             | 34600             | 34000    | 849   | 2%  | 1%                    |
| CHRM4        | Acetylcholine                         | 1176200           | 1081200           | 1128700  | 67175 | 6%  | 2%                    |
| CHRM5        | Acetylcholine                         | 1067600           | 1040800           | 1054200  | 18950 | 2%  | 2%                    |
| CMKLR1       | Chemerin                              | 70200             | 66200             | 68200    | 2828  | 4%  | 0%                    |
| CNR1         | CP55940                               | 98200             | 93200             | 95700    | 3536  | 4%  | 2%                    |
| CNR2         | CP55940                               | 449000            | 385400            | 417200   | 44972 | 11% | 10%                   |
| CRHR1        | Sauvagine                             | 326000            | 285800            | 305900   | 28426 | 9%  | 1%                    |
| CRHR2        | Sauvagine                             | 113000            | 107200            | 110100   | 4101  | 4%  | 0%                    |
| CRTH2        | PGD2                                  | 95000             | 98400             | 96700    | 2404  | 2%  | -2%                   |
| CX3CR1       | Fractalkine                           | 307400            | 325200            | 316300   | 12587 | 4%  | 0%                    |
| CXCR1        | CXCL8                                 | 248200            | 212400            | 230300   | 25314 | 11% | 1%                    |
| CXCR2        | CXCL8                                 | 133600            | 117600            | 125600   | 11314 | 9%  | 2%                    |
| CXCR3        | CXCL11                                | 243800            | 253800            | 248800   | 7071  | 3%  | -1%                   |
| CXCR4        | CXCL12                                | 152600            | 139400            | 146000   | 9334  | 6%  | 3%                    |
| CXCR5        | CXCL13                                | 790200            | 815400            | 802800   | 17819 | 2%  | 0%                    |
| CXCR6        | CXCL16                                | 47600             | 50400             | 49000    | 1980  | 4%  | 4%                    |
| CXCR7        | CXCL12                                | 347800            | 374800            | 361300   | 19092 | 5%  | 0%                    |
| DRD1         | Dopamine                              | 54600             | 52600             | 53600    | 1414  | 3%  | -1%                   |
| DRD2L        | Dopamine                              | 85800             | 88200             | 87000    | 1697  | 2%  | 0%                    |
| DRD2S        | Dopamine                              | 197400            | 185400            | 191400   | 8485  | 4%  | 3%                    |
| DRD3         | Dopamine                              | 792800            | 774400            | 783600   | 13011 | 2%  | 0%                    |
| DRD4         | Dopamine                              | 19400             | 17600             | 18500    | 1273  | 7%  | 3%                    |
| DRD5         | Dopamine                              | 52200             | 45400             | 48800    | 4808  | 10% | 4%                    |
| EBI2         | 7 $\alpha$ ,25-dihydroxycholesterol   | 144000            | 136600            | 140300   | 5233  | 4%  | 1%                    |

|         |                        |         |         |         |       |     |     |
|---------|------------------------|---------|---------|---------|-------|-----|-----|
| EDG1    | S-1-P                  | 184000  | 170600  | 177300  | 9475  | 5%  | 1%  |
| EDG3    | S-1-P                  | 775400  | 697600  | 736500  | 55013 | 7%  | 4%  |
| EDG4    | Oleoyl LPA             | 160400  | 148000  | 154200  | 8768  | 6%  | -1% |
| EDG5    | S-1-P                  | 191400  | 193400  | 192400  | 1414  | 1%  | 0%  |
| EDG6    | S-1-P                  | 935400  | 971800  | 953600  | 25739 | 3%  | -4% |
| EDG7    | Oleoyl LPA             | 80800   | 64600   | 72700   | 11455 | 16% | -1% |
| EDNRA   | Endothelin I           | 26800   | 29400   | 28100   | 1838  | 7%  | 0%  |
| EDNRB   | Endothelin 3           | 61200   | 70600   | 65900   | 6647  | 10% | 1%  |
| F2R     | TFLLR-NH2              | 163200  | 183600  | 173400  | 14425 | 8%  | 0%  |
| F2RL1   | SLIGRL-NH2             | 574200  | 517200  | 545700  | 40305 | 7%  | 1%  |
| F2RL3   | AYPGKF-NH2             | 687000  | 748200  | 717600  | 43275 | 6%  | 0%  |
| FFAR1   | GW9508                 | 405000  | 356800  | 380900  | 34083 | 9%  | -4% |
| FPR1    | WKYMVm-NH2             | 1009600 | 943200  | 976400  | 46952 | 5%  | 4%  |
| FPR1L1  | WKYMVm-NH2             | 72600   | 72000   | 72300   | 424   | 1%  | 0%  |
| FSHR    | FSH                    | 181000  | 171800  | 176400  | 6505  | 4%  | 4%  |
| GALR1   | Galanin                | 307800  | 313200  | 310500  | 3818  | 1%  | 1%  |
| GALR2   | Galanin                | 442400  | 415200  | 428800  | 19233 | 4%  | 0%  |
| GCGR    | Glucagon               | 673400  | 672000  | 672700  | 990   | 0%  | 4%  |
| GHSR    | Ghrelin                | 249600  | 252400  | 251000  | 1980  | 1%  | 1%  |
| GIPR    | GIP                    | 51400   | 46600   | 49000   | 3394  | 7%  | 6%  |
| GLP1R   | Exendin-4              | 2439200 | 2477200 | 2458200 | 26870 | 1%  | 95% |
| GLP2R   | GLP II (1-33)          | 335600  | 318600  | 327100  | 12021 | 4%  | 14% |
| GPR1    | Chemerin               | 37400   | 34800   | 36100   | 1838  | 5%  | 0%  |
| GPR103  | QRFP-26                | 92800   | 85600   | 89200   | 5091  | 6%  | 1%  |
| GPR109A | Nicotinic Acid         | 667400  | 666600  | 667000  | 566   | 0%  | -4% |
| GPR109B | 3-Hydroxyoctanoic acid | 1032000 | 1044200 | 1038100 | 8627  | 1%  | -1% |
| GPR119  | Oleoyl Ethanolamide    | 335200  | 334000  | 334600  | 849   | 0%  | 3%  |
| GPR120  | GW9508                 | 25600   | 27200   | 26400   | 1131  | 4%  | 4%  |
| GPR35   | Zaprinast              | 386800  | 394600  | 390700  | 5515  | 1%  | 3%  |
| GPR92   | Oleoyl LPA             | 186800  | 163200  | 175000  | 16688 | 10% | -3% |
| GRPR    | GRP                    | 48400   | 49000   | 48700   | 424   | 1%  | 0%  |
| HCRTR1  | Orexin A               | 37200   | 41400   | 39300   | 2970  | 8%  | 0%  |
| HCRTR2  | Orexin A               | 62400   | 62600   | 62500   | 141   | 0%  | 0%  |
| HRH1    | Histamine              | 216800  | 206200  | 211500  | 7495  | 4%  | 0%  |
| HRH2    | Histamine              | 82600   | 79000   | 80800   | 2546  | 3%  | 4%  |
| HRH3    | R-a methylhistamine    | 76800   | 82800   | 79800   | 4243  | 5%  | 2%  |
| HRH4    | Histamine              | 635400  | 620600  | 628000  | 10465 | 2%  | -1% |
| HTR1A   | Serotonin / 5-HT       | 606400  | 603200  | 604800  | 2263  | 0%  | 2%  |
| HTR1B   | Serotonin / 5-HT       | 1901200 | 1860200 | 1880700 | 28991 | 2%  | 6%  |
| HTR1E   | Serotonin / 5-HT       | 118200  | 123800  | 121000  | 3960  | 3%  | 8%  |
| HTR1F   | Serotonin / 5-HT       | 326600  | 327400  | 327000  | 566   | 0%  | 3%  |
| HTR2A   | Serotonin / 5-HT       | 300200  | 299800  | 300000  | 283   | 0%  | 3%  |
| HTR2C   | Serotonin / 5-HT       | 419800  | 438600  | 429200  | 13294 | 3%  | 1%  |
| HTR5A   | Serotonin / 5-HT       | 566600  | 530400  | 548500  | 25597 | 5%  | 0%  |
| KISS1R  | Kisspeptin-10          | 47000   | 46000   | 46500   | 707   | 2%  | -1% |
| LHCGR   | hCG                    | 101800  | 90600   | 96200   | 7920  | 8%  | -2% |
| LTB4R   | Leukotriene B4         | 131000  | 154400  | 142700  | 16546 | 12% | 0%  |
| MC1R    | Melanotan II           | 11600   | 15800   | 13700   | 2970  | 22% | -3% |
| MC3R    | Melanotan II           | 99000   | 85600   | 92300   | 9475  | 10% | -1% |
| MC4R    | Melanotan II           | 28400   | 32800   | 30600   | 3111  | 10% | 2%  |
| MC5R    | Melanotan II           | 116000  | 112000  | 114000  | 2828  | 2%  | -2% |
| MCHR1   | MCH                    | 36600   | 38400   | 37500   | 1273  | 3%  | 0%  |
| MCHR2   | MCH                    | 71400   | 71600   | 71500   | 141   | 0%  | 0%  |
| MLNR    | Motilin                | 224800  | 235200  | 230000  | 7354  | 3%  | 1%  |
| MRGPRX1 | BAM(8-22)              | 718000  | 676400  | 697200  | 29416 | 4%  | 0%  |
| MRGPRX2 | Cortistatin 14         | 298000  | 323400  | 310700  | 17961 | 6%  | 2%  |
| MTNR1A  | 2-Iodomelatonin        | 71400   | 67600   | 69500   | 2687  | 4%  | -4% |
| NMBR    | Neuromedin B           | 85400   | 72800   | 79100   | 8910  | 11% | 1%  |
| NMU1R   | Neuromedin U-25        | 96800   | 94000   | 95400   | 1980  | 2%  | 2%  |
| NPBWR1  | Neuropeptide W23       | 138800  | 119800  | 129300  | 13435 | 10% | 1%  |
| NPBWR2  | Neuropeptide W23       | 188600  | 179800  | 184200  | 6223  | 3%  | 3%  |
| NPFFR1  | RFRP-3                 | 148200  | 146400  | 147300  | 1273  | 1%  | 0%  |
| NPSR1B  | Neuropeptide S         | 55400   | 49200   | 52300   | 4384  | 8%  | 1%  |
| NPY1R   | Peptide YY             | 36400   | 32800   | 34600   | 2546  | 7%  | 0%  |
| NPY2R   | Peptide YY             | 217600  | 253000  | 235300  | 25032 | 11% | 1%  |
| NTSR1   | [Lys 8,9] Neurotensin  | 397600  | 396000  | 396800  | 1131  | 0%  | -2% |



|         |                        |        |        |        |       |     |     |
|---------|------------------------|--------|--------|--------|-------|-----|-----|
| OPRD1   | DADLE                  | 109400 | 103800 | 106600 | 3960  | 4%  | 0%  |
| OPRK1   | Dynorphin A            | 20000  | 19600  | 19800  | 283   | 1%  | 0%  |
| OPRL1   | Orphanin FQ            | 164400 | 162600 | 163500 | 1273  | 1%  | 1%  |
| OPRM1   | [Met] Enkephalin       | 97400  | 100800 | 99100  | 2404  | 2%  | 0%  |
| OXER1   | 5-OxoETE               | 176400 | 175000 | 175700 | 990   | 1%  | 0%  |
| OXTR    | Oxytocin               | 27000  | 28800  | 27900  | 1273  | 5%  | 0%  |
| P2RY1   | 2-methylthio-ADP       | 97200  | 99000  | 98100  | 1273  | 1%  | -2% |
| P2RY11  | ATP                    | 63400  | 64200  | 63800  | 566   | 1%  | 0%  |
| P2RY12  | 2-methylthio-ADP       | 210000 | 212200 | 211100 | 1556  | 1%  | 2%  |
| P2RY2   | UTP                    | 343800 | 356800 | 350300 | 9192  | 3%  | -2% |
| P2RY4   | UTP                    | 168600 | 165600 | 167100 | 2121  | 1%  | 2%  |
| P2RY6   | UTP                    | 421800 | 412600 | 417200 | 6505  | 2%  | 1%  |
| PPYR1   | Pancreatic Polypeptide | 48600  | 49800  | 49200  | 849   | 2%  | 1%  |
| PRLHR   | PrRP-31                | 56400  | 59000  | 57700  | 1838  | 3%  | 0%  |
| PROKR1  | EG VEGF                | 19200  | 25000  | 22100  | 4101  | 19% | 1%  |
| PROKR2  | EG VEGF                | 47800  | 39800  | 43800  | 5657  | 13% | 1%  |
| PTAFR   | PAF                    | 722800 | 689200 | 706000 | 23759 | 3%  | 0%  |
| PTGER2  | Prostaglandin E2       | 24000  | 25200  | 24600  | 849   | 3%  | 0%  |
| PTGER3  | Prostaglandin E2       | 398600 | 402600 | 400600 | 2828  | 1%  | 0%  |
| PTGER4  | Prostaglandin E2       | 186800 | 183200 | 185000 | 2546  | 1%  | 3%  |
| PTGFR   | Cloprostenol           | 11400  | 11800  | 11600  | 283   | 2%  | 0%  |
| PTGIR   | Beraprost              | 289200 | 299800 | 294500 | 7495  | 3%  | 2%  |
| PTHR1   | PTH(1-34)              | 125600 | 114800 | 120200 | 7637  | 6%  | 0%  |
| PTHR2   | TIP-39                 | 115000 | 118800 | 116900 | 2687  | 2%  | 1%  |
| RXFP3   | Relaxin-3              | 93200  | 84800  | 89000  | 5940  | 7%  | -3% |
| SCTR    | Secretin               | 607400 | 623400 | 615400 | 11314 | 2%  | 5%  |
| SSTR1   | Somatostatin 28        | 50000  | 49000  | 49500  | 707   | 1%  | -4% |
| SSTR2   | Somatostatin 28        | 13000  | 9000   | 11000  | 2828  | 26% | 0%  |
| SSTR3   | Tyr-SST 14             | 72200  | 63200  | 67700  | 6364  | 9%  | 1%  |
| SSTR5   | Somatostatin 28        | 298000 | 310800 | 304400 | 9051  | 3%  | -1% |
| TACR1   | Substance P            | 457000 | 471000 | 464000 | 9899  | 2%  | -1% |
| TACR2   | Substance P            | 362000 | 380200 | 371100 | 12869 | 3%  | 1%  |
| TACR3   | Substance P            | 133400 | 140600 | 137000 | 5091  | 4%  | 0%  |
| TBXA2R  | I-BOP                  | 175000 | 181000 | 178000 | 4243  | 2%  | -3% |
| TRHR    | TRH                    | 17200  | 15600  | 16400  | 1131  | 7%  | 0%  |
| TSHR(L) | TSH                    | 10000  | 7800   | 8900   | 1556  | 17% | -2% |
| UTR2    | Urotensin II           | 25400  | 26200  | 25800  | 566   | 2%  | -2% |
| VIPR1   | VIP                    | 277800 | 248200 | 263000 | 20930 | 8%  | 1%  |
| VIPR2   | VIP                    | 366600 | 327000 | 346800 | 28001 | 8%  | 0%  |

[a] E6 was screened against 168 GPCRs in a panel of function cell-based assays (gpcrMAX<sup>SM</sup>, DiscoverRx). Results are expressed as % activity of control, calculated by [100 – (E6 agonist activity / control agonist activity) x 100]. E6 was tested in duplicate at a concentration of 1  $\mu$ M and the control ligands were tested in duplicate with 10 concentrations.

## SI Appendix Figures

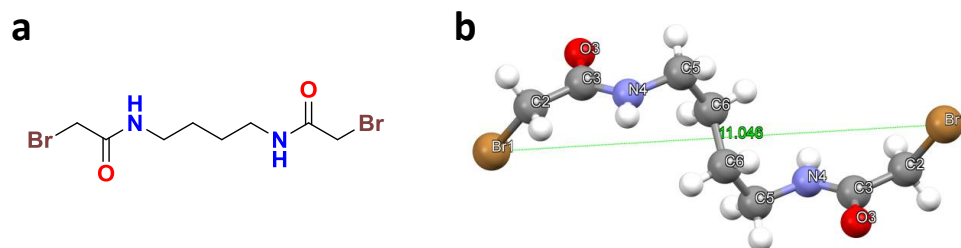

**Figure S1.** Chemical structure (a) and crystal structure (b) of the cross-linker L2. The green line indicates the Br-Br distance of 11.05 Å.

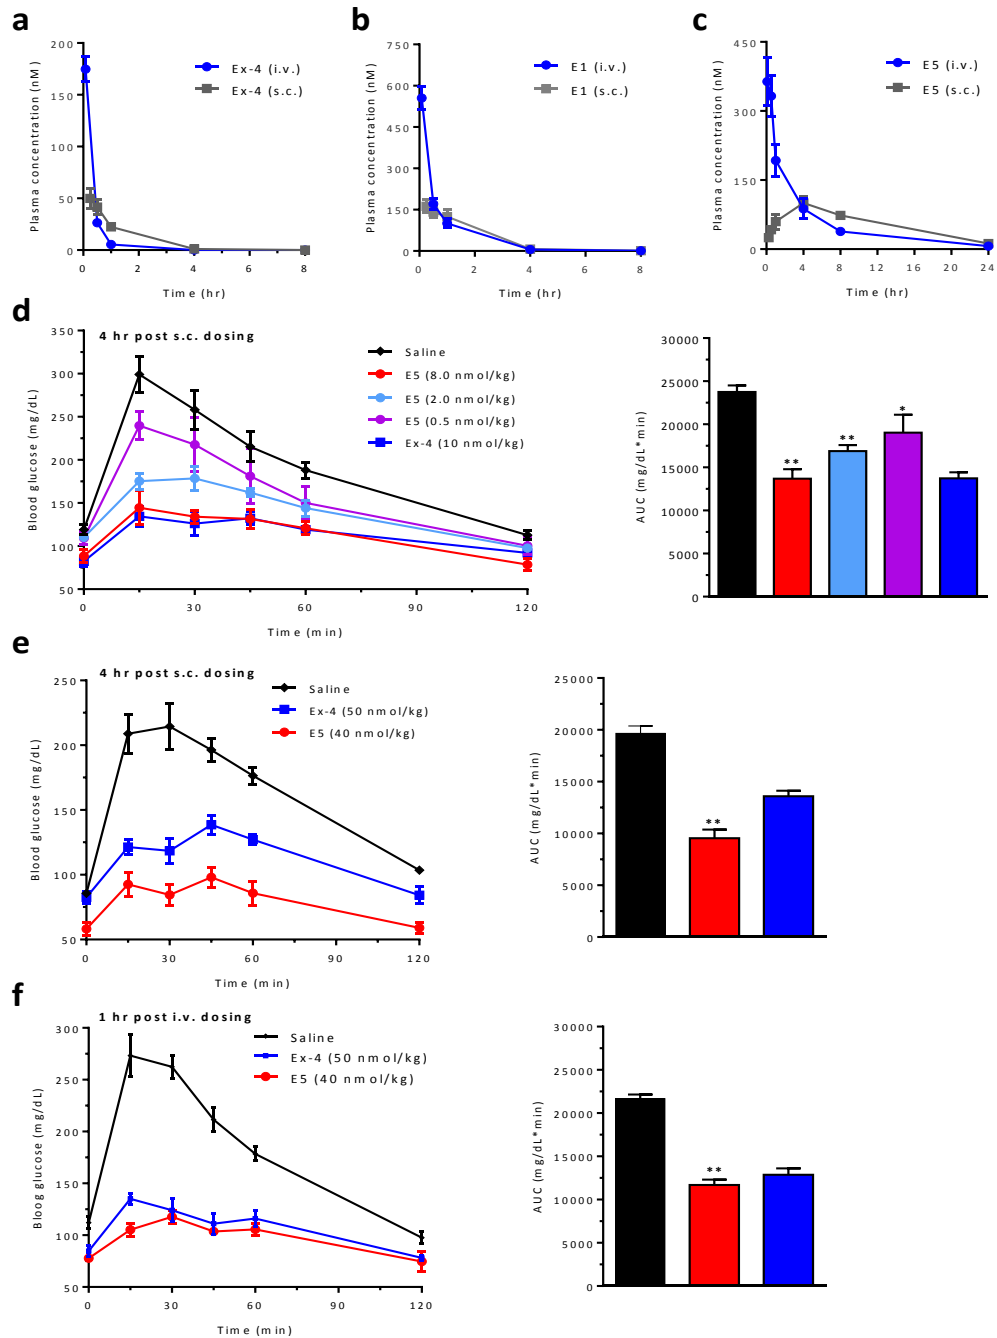

**Figure S2.** Effects of cross-linking on pharmacokinetics and OGTT in CD1 mice. Plasma concentrations of Ex-4 (10 nmol/kg) (a), E1 (7.5 nmol/kg) (b), E5 (7.5 nmol/kg) (c) in mice (n = 4 per group) after intravenous or subcutaneous administration. The peptide concentrations in plasma at various time points were determined by *in vitro* GLP-1R activity assay. Assay was performed in triplicate. (d–f) Plasma glucose excursion during an oral glucose tolerance test (OGTT) in mice (n = 5 per group). Mice were subcutaneously injected with vehicle, E5, or Ex-4 for 4 hours in a dose-dependent manner (d,e) or intravenously injected for 1 hour (f) prior to the glucose challenge. Bar graph showing the total amount of glucose in the mice obtained by measuring the area under curve (AUC). \*P < 0.05, \*\*P < 0.01, E6 versus vehicle.

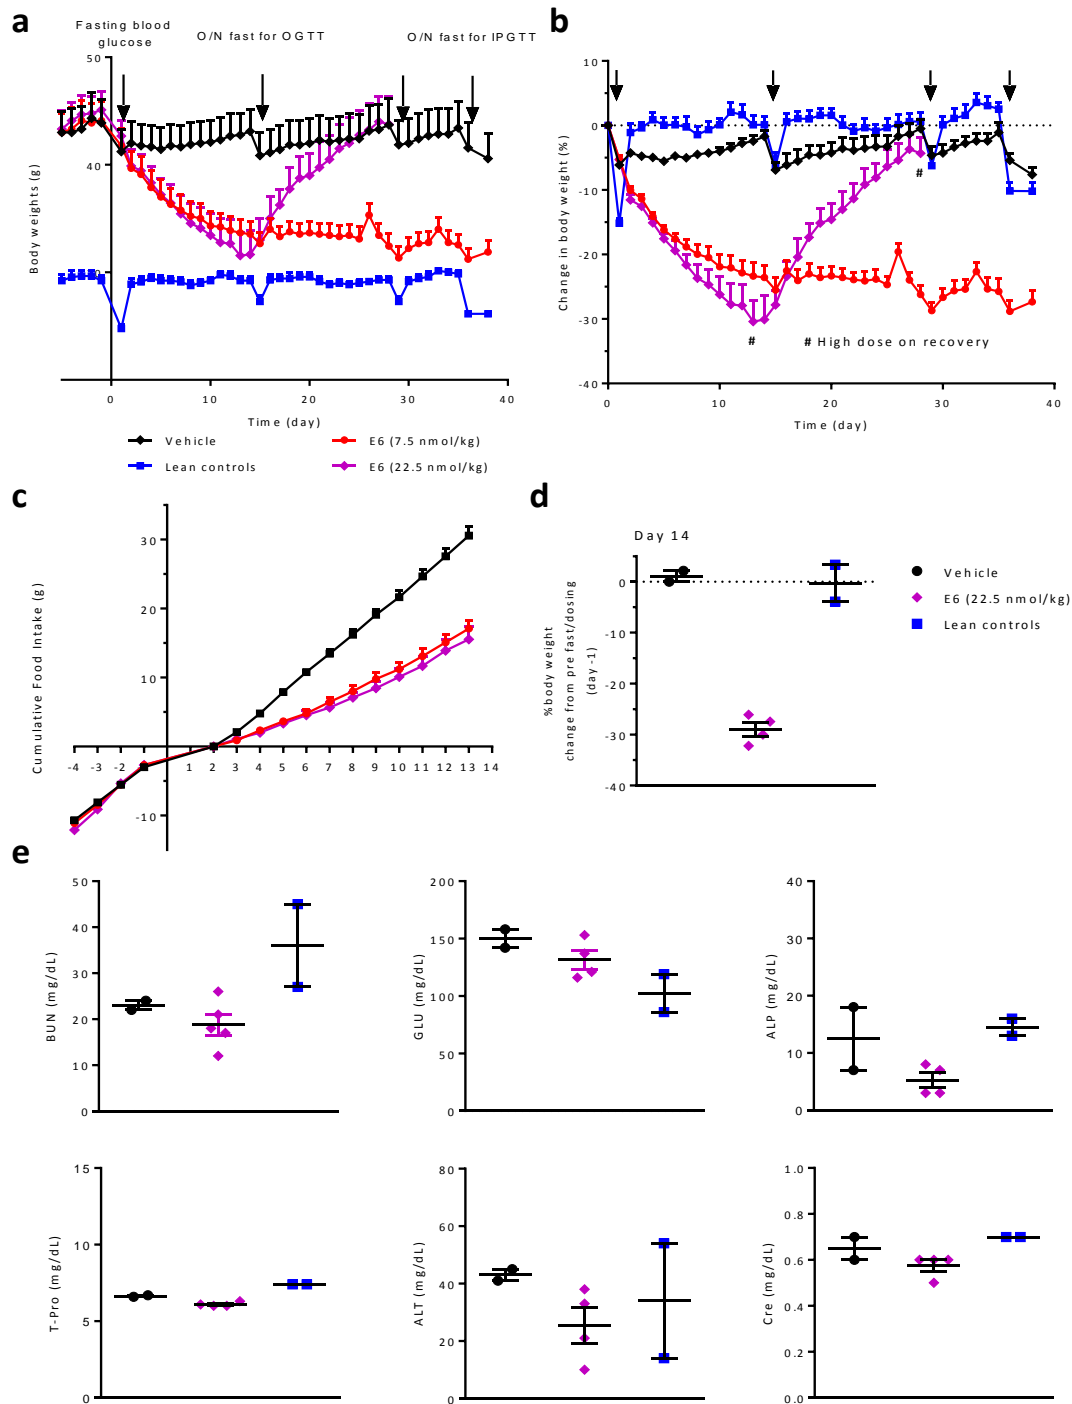

**Figure S3.** High-dose reversal study after E6 withdrawal in diet-induced obese (DIO) mice. Effects on (a–b) body weight regain after treatment cessation, cumulative food intake (c), body weight change on day 14 (d), (e) Effect of E6 on liver function and kidney function on day 14. Data are presented as mean  $\pm$  SD ( $n = 4$ ). BUN = blood urea nitrogen; GLU = glucose, ALP = alanine phosphatase, T-Pro = total protein, ALT = alanine aminotransferase; Cre = Creatinine. All DIO mice were treated by daily subcutaneous injections at a dose of 22.5 nmol/kg or vehicle. Lean mice were fed control.

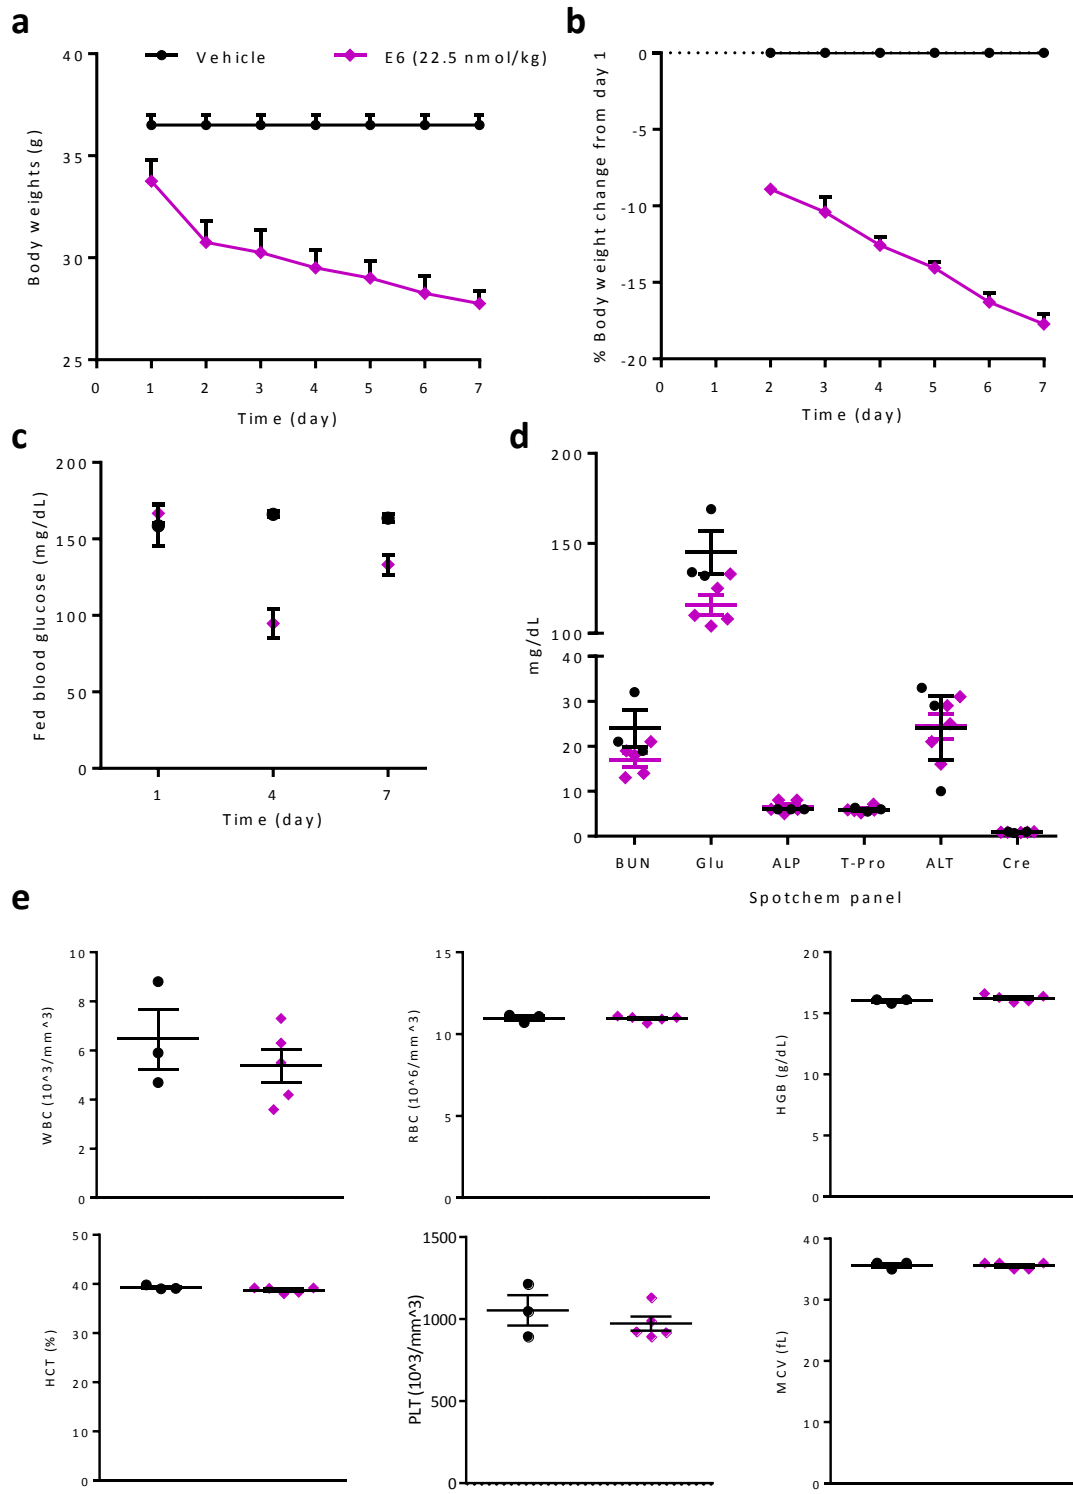

Continued

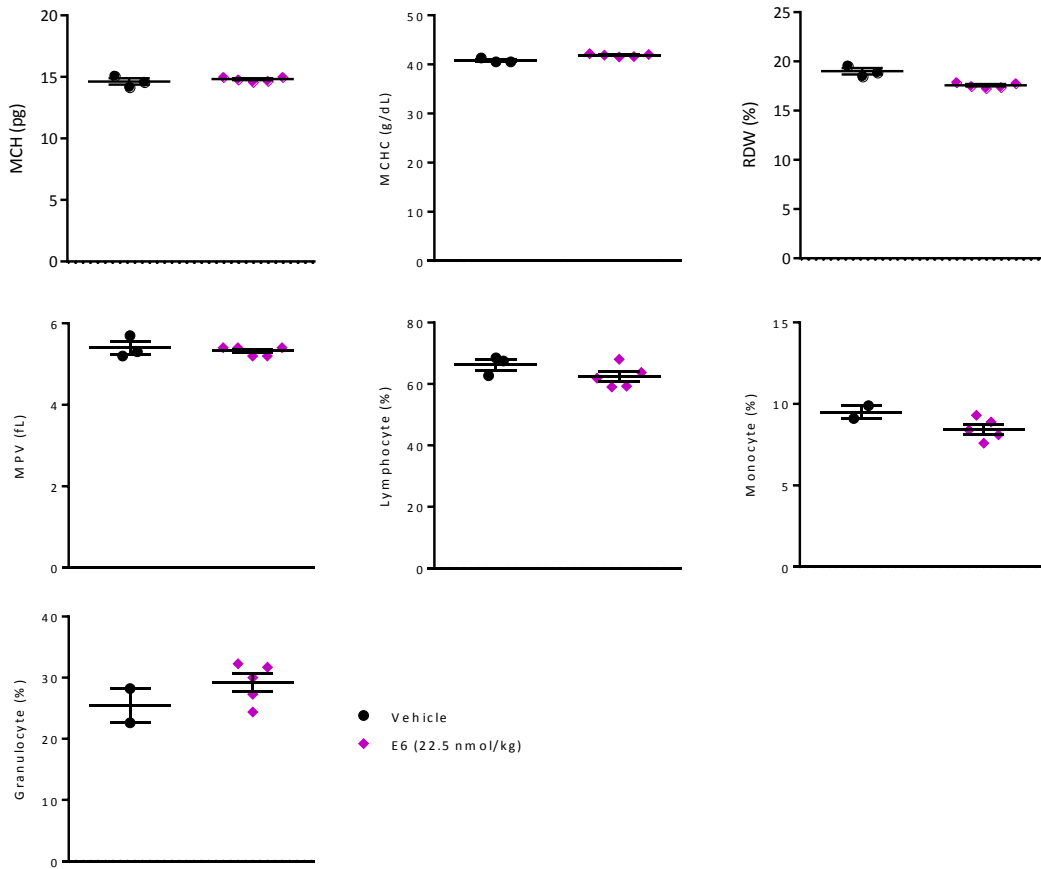

**Figure S4.** One-week repeated subcutaneous dose toxicity studies of E6 in diet-induced obese (DIO) mice. Effects on (a–b) body weight change, fed blood glucose (c), liver function and kidney function (d) and (e) hematological parameters. Data are presented as mean  $\pm$  SD (n = 5). WBC = white blood cell (leukocyte), RBC = red blood cell (erythrocyte), HGB = hemoglobin, HCT = hematocrit, PLT = platelet, MCV = mean corpuscular volume, MCH = mean corpuscular hemoglobin, MCHC = mean corpuscular hemoglobin concentration, RDW = red cell distribution width, MPV = mean platelet volume.

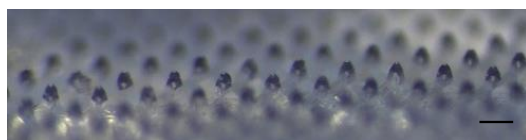

**Figure S5** Representative photo of E6 MSA after a 5 min application to skin. (Scale bar 200  $\mu\text{m}$ ). E6-containing microstructure tips dissolve rapidly within the skin, as evidenced by the absence of sharp tips. The difference in coloration between the upper portion of the microstructures (dark colored tips and stumps) and their bases (light colored) is caused by the lighting technique used to enhance visibility of the microstructures. Under normal lighting conditions, the entire microstructure is translucent.

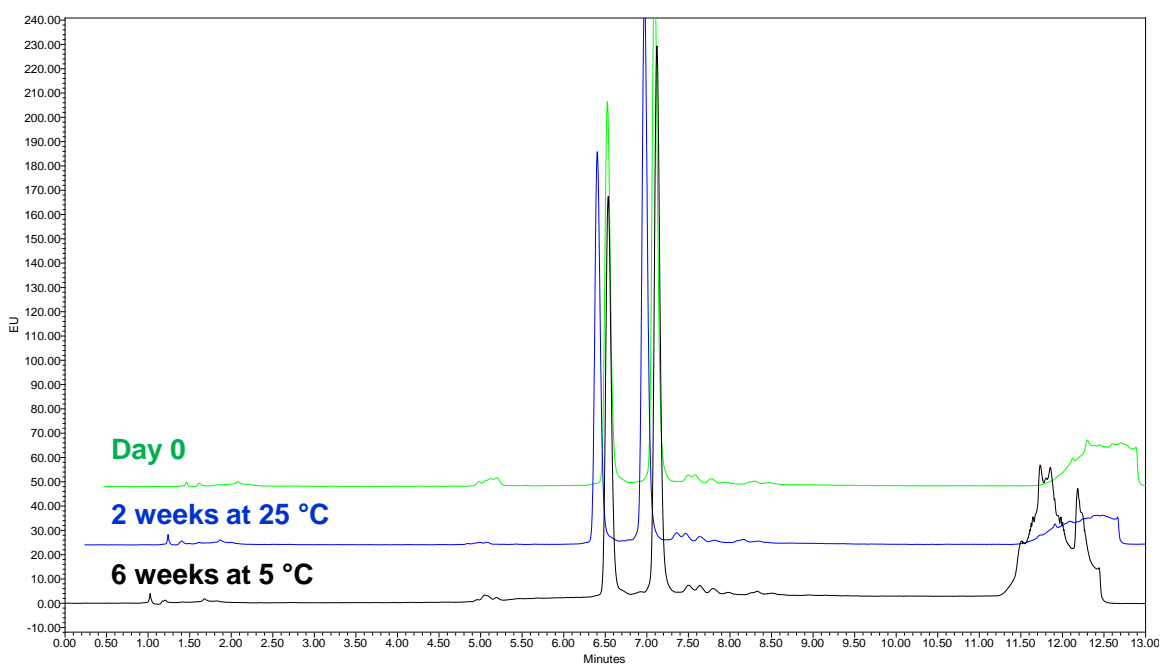

**Figure S6** Stability of E6 in MicroCor MSAs stored at 25 °C for 2 weeks and 5 °C for 6 weeks. There were no extra peaks compared to Day 0.

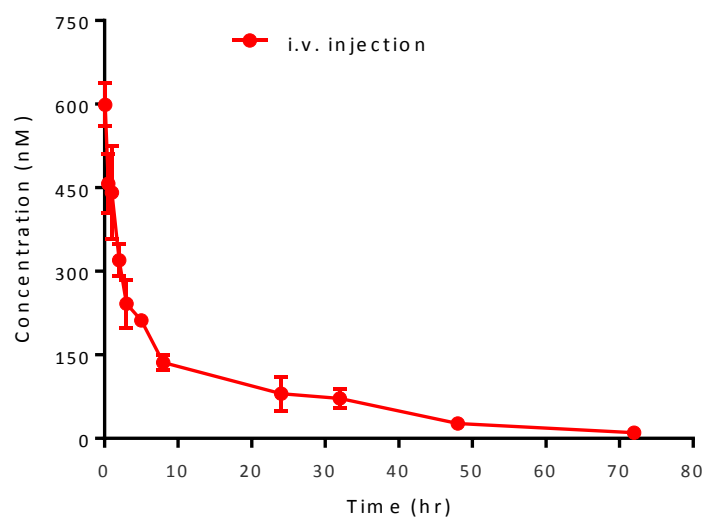

**Figure S7** Pharmacokinetics of E6 in male Dunkin-Hartley guinea pigs (n = 4 per group) by *i.v.* injection. The peptide concentrations in plasma at various time points were determined by in vitro GLP-1R activity assay. Assay was performed in triplicate. The elimination half-life with *i.v.* injection was about 16.5 h.
